# Supplementary material
Source: Springer Nature journal article supplement (https://www.springermedizin.de/resource/supplementary/13229_2011_34_MOESM10_ESM.PDF/9676016)
Supplement: MOESM10 [file 9676016]

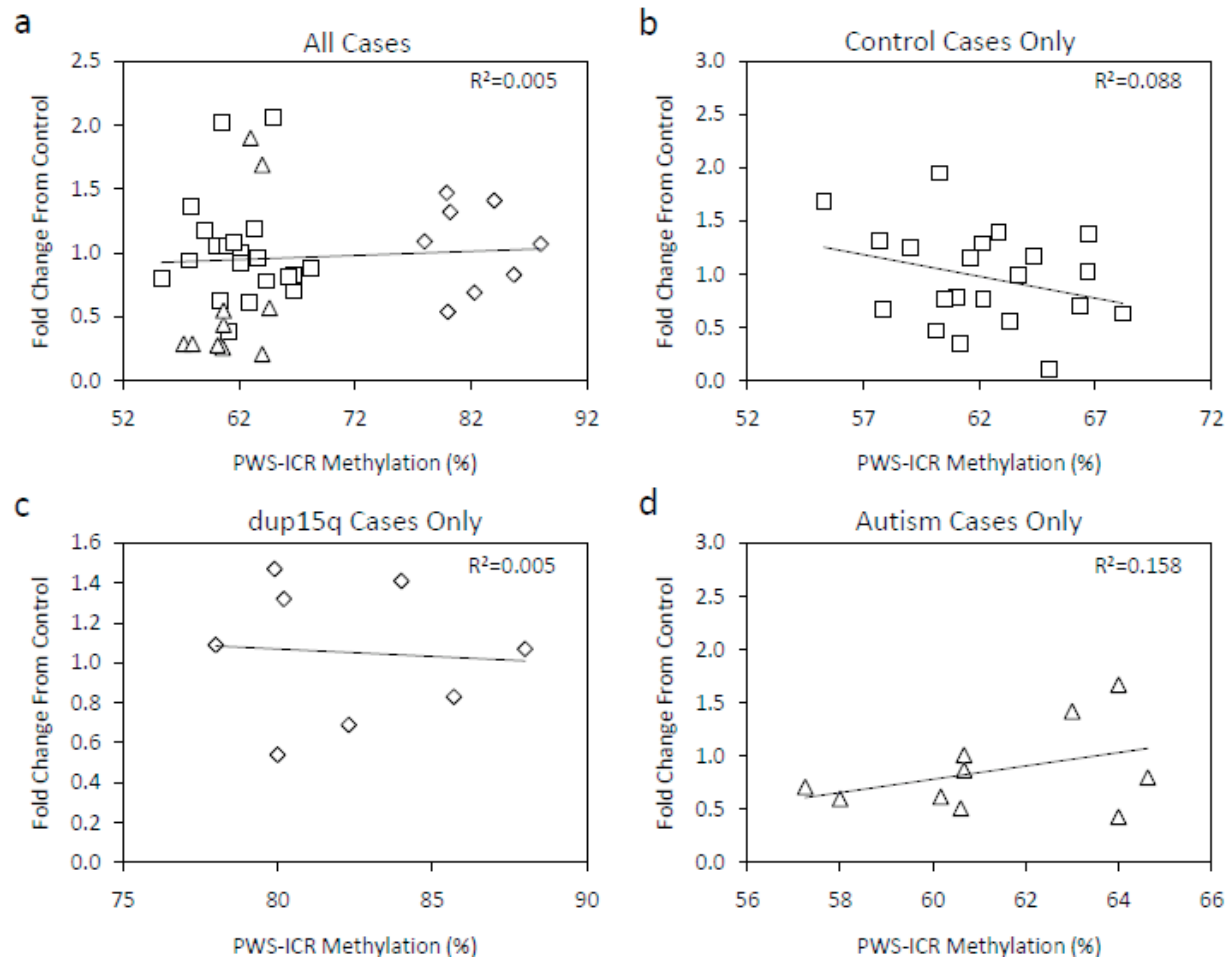

**GABRB3 protein levels did not correlate with PWS-IC methylation.** When all three groups were analyzed together or separately there was no correlation between % PWS-IC methylation and GABRB3 protein levels.
